# Supplementary material
Source: PubMed Central journal article supplement (PMC7964022)
Supplement: 2180_tables.pdf [file 2180_tables.pdf]

**On-line Table 1: Formatted questions for telephone interview****Questions**

- Q1: From the interlaminar ESI in 2007 (or 2008), did you have relief from your back pain at that time? (completely, much, slight, no improvement)
- Q2: Since the interlaminar ESI in 2007 (or 2008), have you had relief from your back pain until now? (completely, much, slight, no improvement)
- Q3: How about current back pain compared with 2007 (or 2008) before the interlaminar ESI ? (aggravated, no change, slightly improved, much improved, no discomfort)
- Q4: Did you have an operation after the interlaminar ESI? (Yes/No)
- Q5: Would you repeat the interlaminar ESI if necessary? (Yes/No)
- Q6: Would you recommend the interlaminar ESI to others who have similar symptoms? (Yes, No)
- Q7: NASS patient-satisfaction index (1 = interlaminar ESI met my expectations; 2 = I improved less than I had hoped, but I would undergo the same procedure again for the same result; 3 = interlaminar ESI helped, but I would not undergo the same procedure again for the same result; 4 = I am the same or worse than before interlaminar ESI)

**On-line Table 2: Q1: From the interlaminar ESI in 2007 (or 2008), did you have relief from your back pain at that time?**

|                     | No. Patients | %    |
|---------------------|--------------|------|
| Completely improved | 2            | 2.9  |
| Much improved       | 39           | 57.4 |
| Slightly improved   | 11           | 16.2 |
| Not improved        | 16           | 23.5 |
| Total               | 68           | 100  |

**On-line Table 3: Q2: Since the interlaminar ESI in 2007 (or 2008), have you had relief of your back pain until now?**

|                     | No. Patients | %    |
|---------------------|--------------|------|
| Completely improved | 1            | 1.5  |
| Much improved       | 19           | 27.9 |
| Slightly improved   | 17           | 25.0 |
| Not improved        | 31           | 45.6 |
| Total               | 68           | 100  |

**On-line Table 4: Q3: How about current back pain compared with 2007 (or 2008) before the interlaminar ESI?**

|                   | No. Patients | %    |
|-------------------|--------------|------|
| No pain           | 1            | 1.5  |
| Much improved     | 27           | 39.7 |
| Slightly improved | 16           | 23.5 |
| No change         | 22           | 32.4 |
| Aggravated        | 2            | 2.9  |
| Total             | 68           | 100  |

**On-line Table 5: Q7: NASS patient-satisfaction scale**

| NASS <sup>a</sup> | No. Patients | %    |
|-------------------|--------------|------|
| 1                 | 29           | 42.6 |
| 2                 | 15           | 22.1 |
| 3                 | 8            | 11.8 |
| 4                 | 16           | 23.5 |
| Total             | 68           | 100  |

<sup>a</sup> The NASS patient-satisfaction index: 1 = interlaminar epidural steroid injection met my expectations; 2 = I improved less than I had hoped, but I would undergo the same procedure again for the same result; 3 = interlaminar epidural steroid injection helped, but I would not undergo the same procedure again for the same result; 4 = I am the same or worse than before the interlaminar epidural steroid injection.
